# Supplementary material
Source: PubMed Central journal article supplement (PMC3990440)
Supplement: NIHMS560003-supplement-1.pdf [file NIHMS560003-supplement-1.pdf]

# Screening procedure

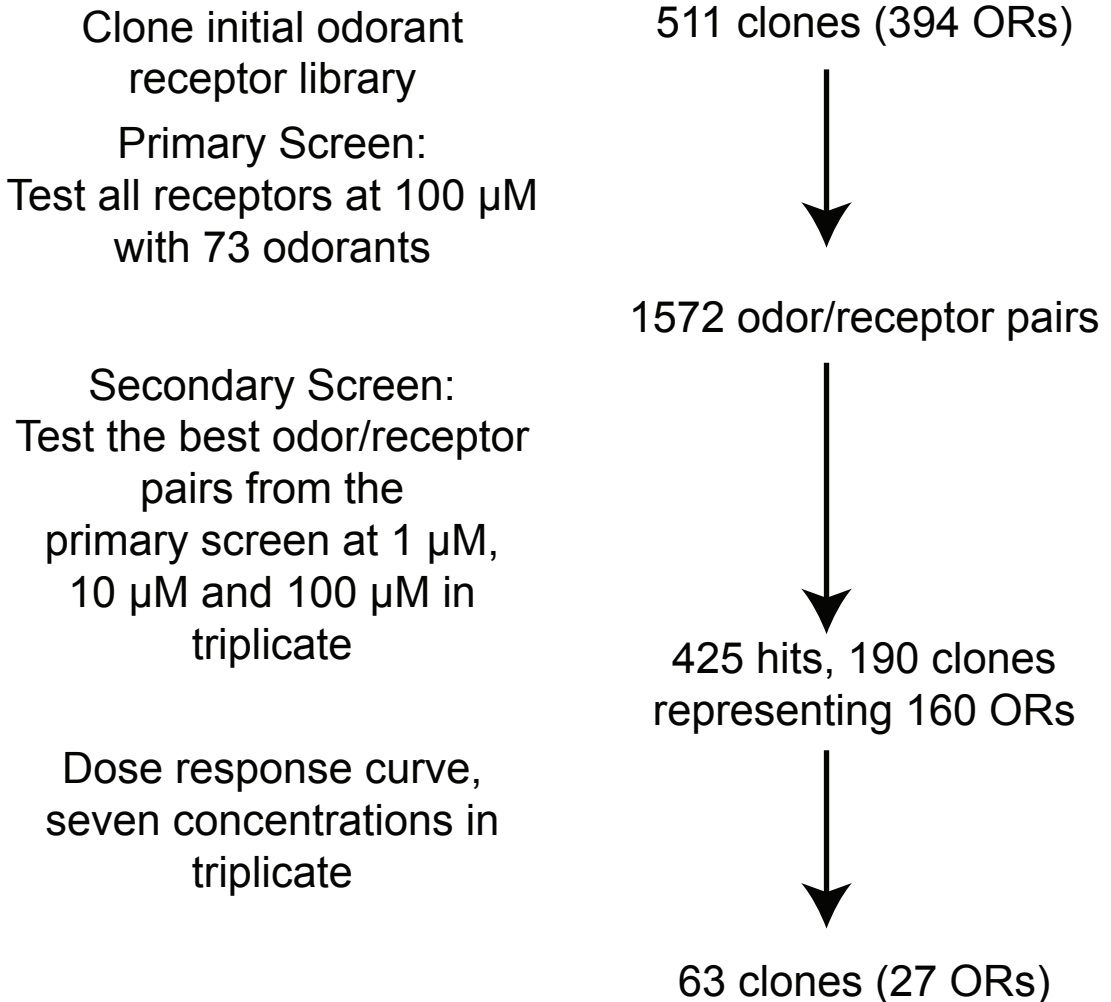

**Supplementary Figure 1** Outline of the screening procedure.

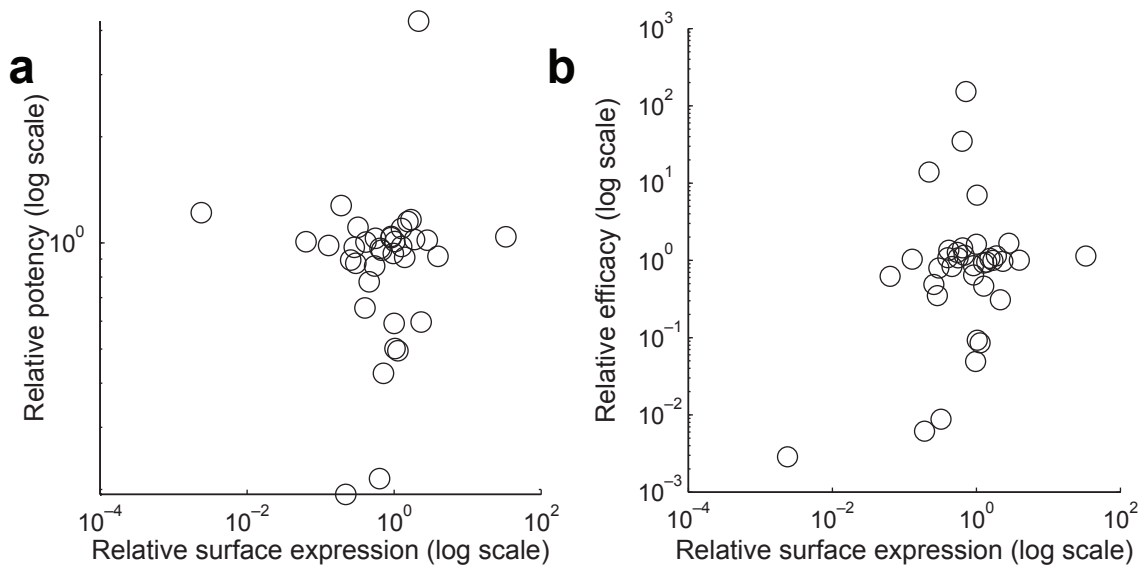

**Supplementary Figure 2.** Relative surface expression, measured by a fluorescence-activated cell sorter, does not correlate with relative potency (a) (Spearman  $\rho = -0.01$ ,  $n = 38$ ,  $p = 0.95$ ) or relative efficacy (b) (Spearman  $\rho = 0.16$ ,  $n = 38$ ,  $p = 0.33$ ). For each variant we compared the change in mean surface expression (PE fluorescence intensity) to the change in the receptor potency (EC50 from the best-fit sigmoidal model) or receptor efficacy (top-bottom from the best-fit sigmoidal model) relative to the most common functional variant.

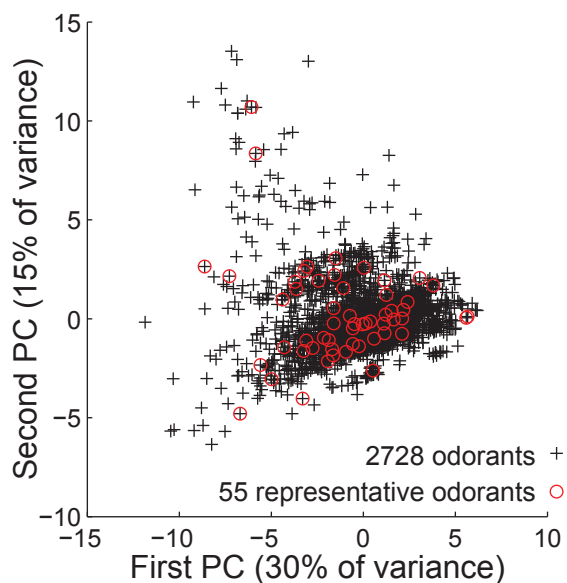

**Supplementary Figure 3.** We calculated 20 chemical descriptors, previously shown to explain more than 62% of the variance in functional responses in a heterologous system, for 2728 odorants 1. For display purposes, the odorants are projected onto a 2D space made of the first and second principal components. Black crosses represent all 2728 odorants, red circles represent the 55 odorants chosen to span olfactory space.

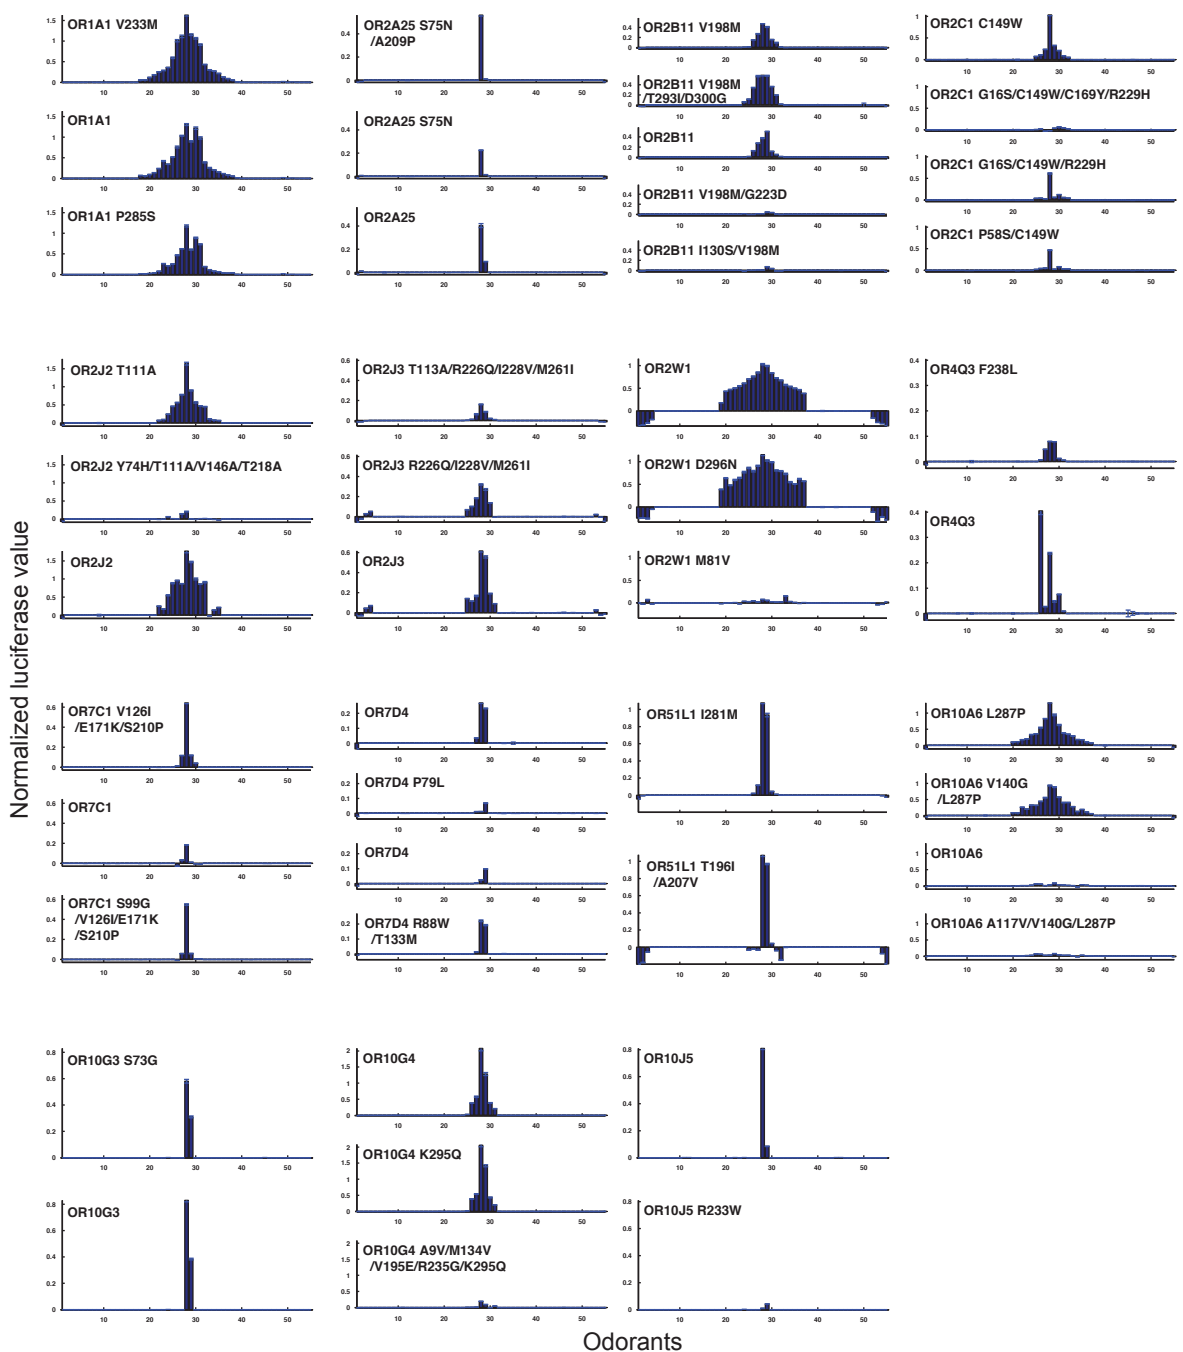

**Supplementary Figure 4.** Sensitivity-ordered tuning curves for odorant receptors. The y-axis represents the luciferase response normalized by Renilla Luciferase. The 55 odorants are displayed along the x-axis according to the strength of response they elicited from the reference allele of each receptor (defined as the most frequent allele that shows activity significantly higher than the vector control (2-tailed t-test,  $\alpha=0.05/55$ ), that odorant's response was set to zero across all variants. The odors eliciting the strongest response are placed at the center of the distribution. The order of odorants is the same across all variants of a given receptor, but is different across receptors. Error bars represent standard error.

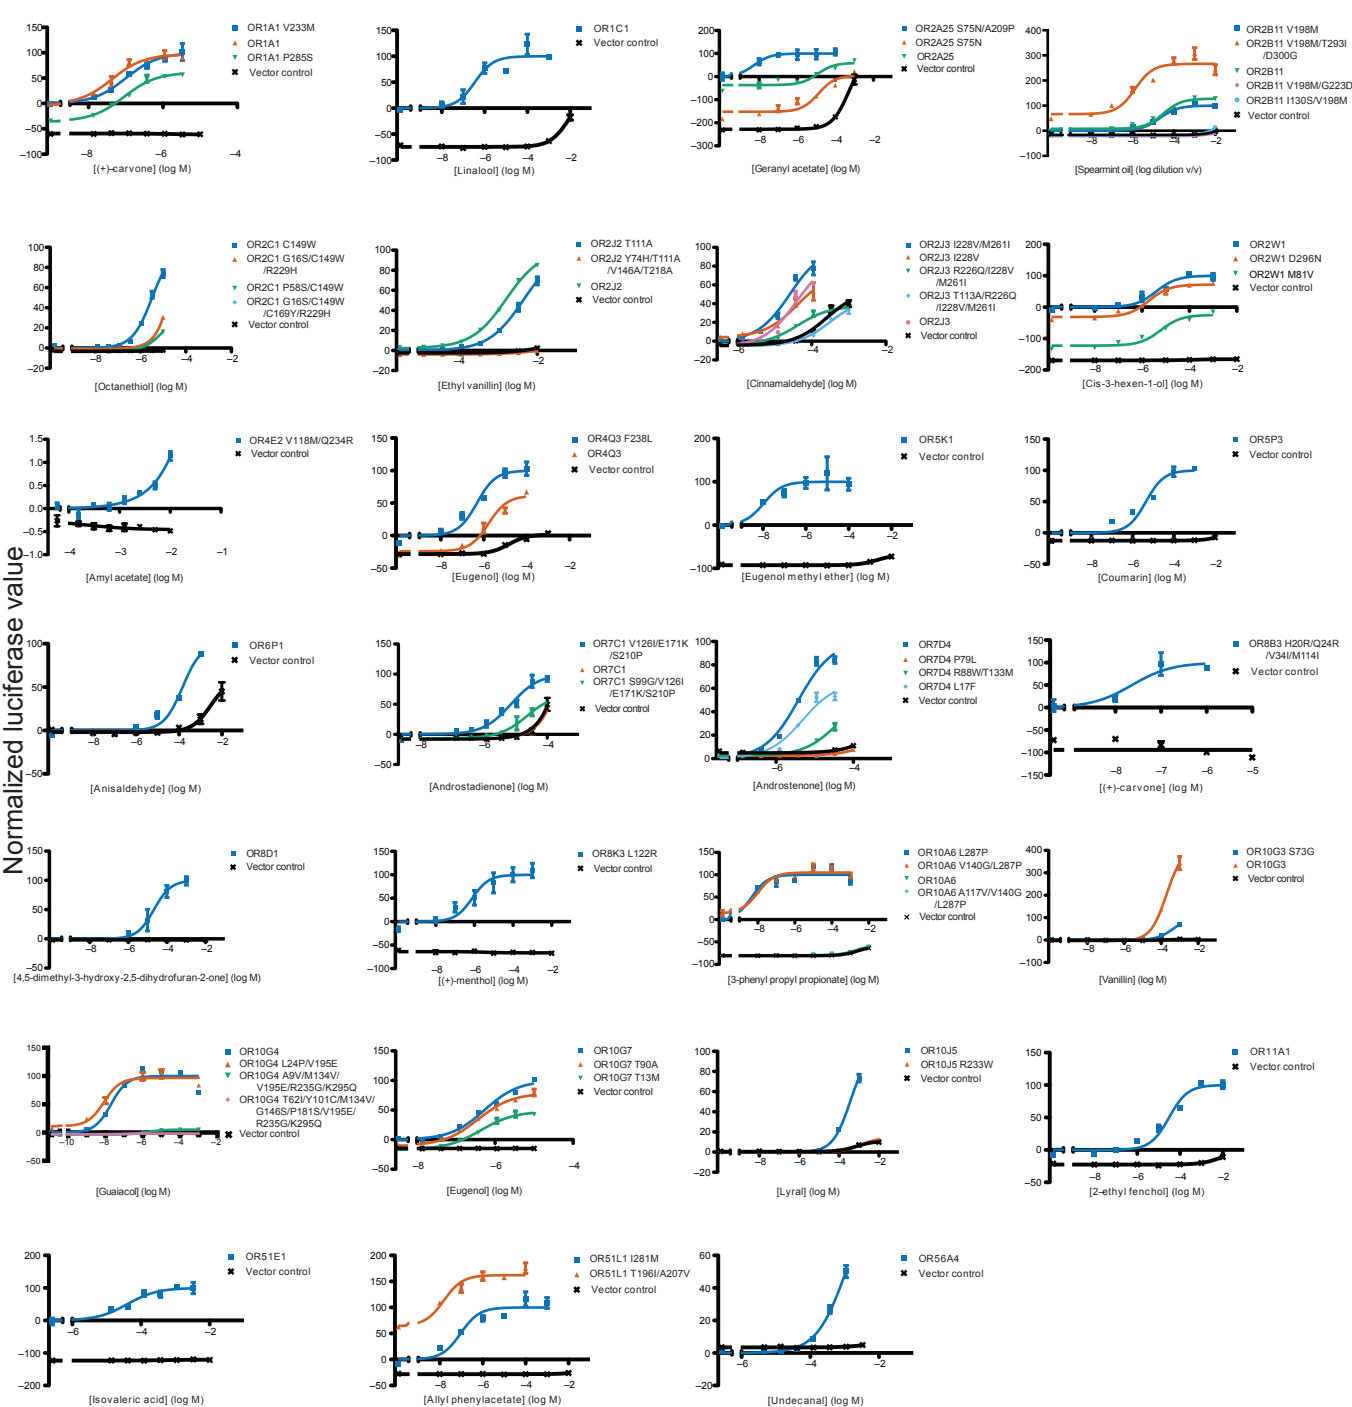

**Supplementary Figure 5.** Dose response curves for odorant receptors. Y-axis values are normalized to the reference allele (shown in dark blue), here defined as the most frequent allele in the 1000 genomes population that shows activity significantly higher than the vector control. Error bars represent standard error.

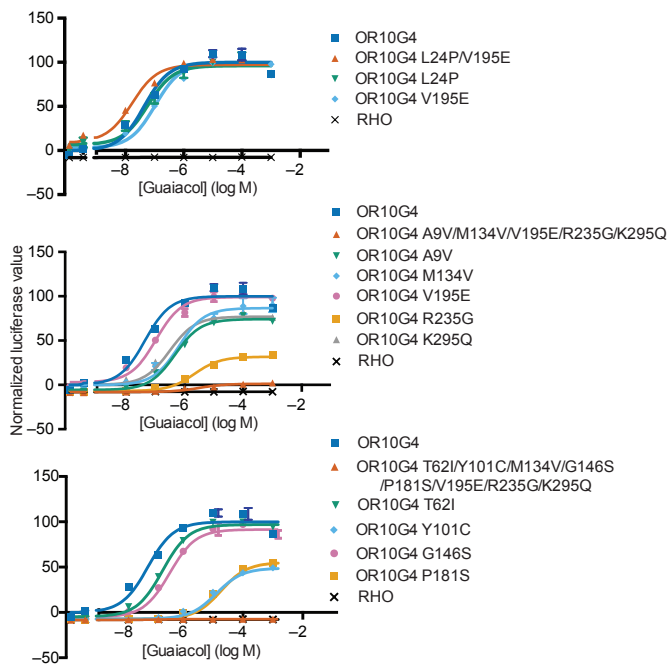

**Supplementary Figure 6** Functional characterization of OR10G4 polymorphisms. Y-axis values are normalized to the reference allele (shown in dark blue), here defined as the most frequent allele in the 1000 genomes population that shows activity significantly higher than the vector control. Error bars represent standard error.

| CAS number | SMILES                                                               | Common name                  | Abbreviation |
|------------|----------------------------------------------------------------------|------------------------------|--------------|
| 2244-16-8  | <chem>CC(=C)[C@H]1CC=C(C(=O)C1)C</chem>                              | (+)-carvone                  | +CAR         |
| 15356-60-2 | <chem>CC1CCC(C(C1)O)C(C)C</chem>                                     | (+)-menthol                  | +MEN         |
| 121-14-2   | <chem>[O-][N+](=O)c1ccc(c(c1)[N+](=O)[O-])C</chem>                   | 2,4-DNT                      | 24DNT        |
| 821-55-6   | <chem>CCCCCCCC(=O)C</chem>                                           | 2-nonanone                   | 29ONE        |
| 18368-91-7 | <chem>CCC1(O)C2(C)CCC(C1(C)C)C2</chem>                               | 2-ethylfenchol               | 2EF          |
| 15679-19-3 | <chem>CCOc1nccs1</chem>                                              | 2-ethoxythiazole             | 2ET          |
| 3149-28-8  | <chem>COc1cnccn1</chem>                                              | 2-Methoxypyrazine            | 2MPYR        |
| 122-74-7   | <chem>CCC(=O)OCCc1cccc1</chem>                                       | 3-phenyl propyl propionate   | 3PPP         |
| 1076-38-6  | <chem>Oc1cc(=O)c2c(o1)cccc2</chem>                                   | 4-Hydroxycoumarin            | 4HC          |
| 628-63-7   | <chem>CCCCOC(=O)C</chem>                                             | N-amyl acetate               | AA           |
| 18339-16-7 | <chem>O=C1CC[C@]2([C@H](C1)CC[C@@H]1[C@@H]2CC[C@]2([C@H]1)C)C</chem> | androsthenone                | AND          |
| 4075-07-4  | <chem>O=C1CCC2(C(=C1)CCC1C2CCC2(C1CC=C2)C)C</chem>                   | androstadienone              | ANDI         |
| 123-11-5   | <chem>COc1ccc(cc1)C=O</chem>                                         | analdehyde                   | ANIS         |
| 1797-74-6  | <chem>C=CCOC(=O)Cc1cccc1</chem>                                      | allyl phenyl acetate         | APA          |
| 7756-96-9  | <chem>CCCCOC(=O)c1cccc1N</chem>                                      | Butyl anthranilate           | BA           |
| 7492-70-8  | <chem>CCCCOC(=O)C(OC(=O)CCC)C</chem>                                 | butyl butyryl lactate        | BBL          |
| 23726-91-2 | <chem>C/C=C/C(=O)C1=C(C)CCCC1(C)C</chem>                             | beta-damascone               | BDAM         |
| 24330-52-7 | <chem>SCC[C@H](S)C</chem>                                            | 1,3-butane dithiol           | BDT          |
| 71-43-2    | <chem>c1cccc1</chem>                                                 | benzene                      | BEN          |
| 592-84-7   | <chem>CCCCOC=O</chem>                                                | butyl formate                | BF           |
| 928-96-1   | <chem>OCCC=CCC</chem>                                                | cis-3-hexen-1-ol             | C3HEX        |
| 14371-10-9 | <chem>O=C/C=C/c1cccc1</chem>                                         | Cinnamaldehyde               | CINMA        |
| 4437-20-1  | <chem>S(Cc1ccc(o1)SCc1ccc(o1)S)C</chem>                              | coffee difuran               | COFFDF       |
| 91-64-5    | <chem>O=c1ccc2c(o1)cccc2</chem>                                      | Coumarin                     | COUM         |
| 112-31-2   | <chem>CCCCCCCCC=O</chem>                                             | decyl aldehyde               | DA           |
| 334-48-5   | <chem>CCCCCCCCC(=O)O</chem>                                          | decanoic acid                | DECAC        |
| 10022-28-3 | <chem>CCCCCCCC(OC)OC</chem>                                          | 1,1-dimethoxy-octane         | DM8          |
| 28664-35-9 | <chem>CC1OC(=O)C(=C1)O</chem>                                        | caramel furanone             | DMHDMF       |
| 75-18-3    | <chem>CSC</chem>                                                     | dimethyl sulfide             | DMS          |
| 105-95-3   | <chem>O=C1CCCCCCCCCCCC(=O)OCCO1</chem>                               | ethylene brassylate          | EB           |
| 97-53-0    | <chem>C=CCc1ccc(c(c1)OC)O</chem>                                     | eugenol                      | EUG          |
| 93-15-2    | <chem>C=CCc1ccc(c(c1)OC)OC</chem>                                    | eugenol methyl ether         | EUGME        |
| 121-32-4   | <chem>CCOc1cc(C=O)ccc1O</chem>                                       | ethyl vanillin               | EVAN         |
| 105-87-3   | <chem>C/C(=C\COC(=O)C)/CCC=C(C)C</chem>                              | geranyl acetate              | GA           |
| 90-05-1    | <chem>COC1=CC=CC=C1O</chem>                                          | guaiacol                     | GUAIA        |
| 78-81-9    | <chem>NCC(C)C</chem>                                                 | isobutyl amine               | IA           |
| 513-44-0   | <chem>SCC(C)C</chem>                                                 | isobutyl mercaptan           | IM           |
| 2035-99-6  | <chem>CCCCCCCC(=O)OCCC(C)C</chem>                                    | isoamyl octanoate            | IO           |
| 503-74-2   | <chem>CC(CC(=O)O)C</chem>                                            | isovaleric acid              | IVA          |
| 5328-37-0  | <chem>OCC(C(C(=O)O)O)O</chem>                                        | laevo-arabinose              | LA           |
| 78-70-6    | <chem>C=CC(CCC=C(C)C)(O)C</chem>                                     | linalool                     | LIN          |
| 31906-04-4 | <chem>O=CC1CCC(=CC1)CCCC(O)(C)C</chem>                               | Lylal                        | LYR          |
| 57500-00-2 | <chem>CSSCc1ccc1</chem>                                              | methyl furfuryl disulfide    | MFUR         |
| 554-12-1   | <chem>CCC(=O)OC</chem>                                               | Methyl propionate            | MP           |
| 2345-24-6  | <chem>C/C(=C/COC(=O)C(C)C)/CCC=C(C)C</chem>                          | neryl isobutyrate            | NI           |
| 2306-88-9  | <chem>CCCCCCCCOC(=O)CCCCC</chem>                                     | octyl octanoate              | OO           |
| 111-88-6   | <chem>CCCCCCCCS</chem>                                               | octanethiol                  | OTHI         |
| 122-78-1   | <chem>O=CCc1cccc1</chem>                                             | phenyl acetaldehyde          | PA           |
| 4286-15-1  | <chem>CCC(c1cccc1)C(=O)O</chem>                                      | (S)-(+)-2-Phenylbutyric acid | PBA          |
| 290-37-9   | <chem>n1ccncc1</chem>                                                | Pyrazine                     | PYR          |
| 91-22-5    | <chem>c1ccc2c(c1)nccc2</chem>                                        | quinoline                    | QUIN         |
| 5989-27-5  | <chem>CC1=CC[C@@H](CC1)C(=C)C</chem>                                 | r-limonene                   | RLIM         |
| 15707-24-1 | <chem>CCc1nccnc1CC</chem>                                            | shoyu pyrazine               | SP           |
| 4023-65-8  | <chem>OC(=O)C/C(=C\C(=O)O)/C(=O)O</chem>                             | trans-Aconitic acid          | TAA          |
| 98-55-5    | <chem>CC1=CC[C@@H](CC1)C(O)(C)C</chem>                               | terpineol                    | TERP         |
| 80-26-2    | <chem>CC(=O)OC(C1CCC(=CC1)C)(C)C</chem>                              | terpinyl acetate             | TERPA        |
| 68-11-1    | <chem>OC(=O)CS</chem>                                                | thioglycolic acid            | THIOA        |
| 60633-24-1 | <chem>CC1SC(C(=N1)C)C</chem>                                         | TMT                          | TMT          |
| 112-44-7   | <chem>CCCCCCCCC=O</chem>                                             | undecanal                    | UNDEC        |
| 121-33-5   | <chem>COc1cc(C=O)ccc1O</chem>                                        | vanillin                     | VAN          |

**Supplementary Table 1** Odorants used in the study. Odorants are listed with their Chemical Abstract Service (CAS) registry number, simplified molecular-input line-entry system (SMILES) identifier, common name, and abbreviation used in the figures.
