# Supplementary material
Source: PubMed Central journal article supplement (PMC3990440)
Supplement: NIHMS560003-supplement-8.pdf [file NIHMS560003-supplement-8.pdf]

| CAS number | SMILES                                                                    | Common name                  | Abbreviation |
|------------|---------------------------------------------------------------------------|------------------------------|--------------|
| 2244-16-8  | <chem>CC(=C)[C@H]1CC=C(C(=O)C1)C</chem>                                   | (+)-carvone                  | +CAR         |
| 15356-60-2 | <chem>CC1CCC(C(C1)O)C(C)C</chem>                                          | (+)-menthol                  | +MEN         |
| 121-14-2   | <chem>[O-][N+](=O)c1ccc(c(c1)[N+](=O)[O-])C</chem>                        | 2,4-DNT                      | 24DNT        |
| 821-55-6   | <chem>CCCCCCCC(=O)C</chem>                                                | 2-nonanone                   | 29ONE        |
| 18368-91-7 | <chem>CCC1(O)C2(C)CCC(C1(C)C)C2</chem>                                    | 2-ethylfenchol               | 2EF          |
| 15679-19-3 | <chem>CCOc1nccs1</chem>                                                   | 2-ethoxythiazole             | 2ET          |
| 3149-28-8  | <chem>COc1cnccn1</chem>                                                   | 2-Methoxypyrazine            | 2MPYR        |
| 122-74-7   | <chem>CCC(=O)OCCc1ccccc1</chem>                                           | 3-phenyl propyl propionate   | 3PPP         |
| 1076-38-6  | <chem>Oc1cc(=O)c2c(o1)cccc2</chem>                                        | 4-Hydroxycoumarin            | 4HC          |
| 628-63-7   | <chem>CCCCOC(=O)C</chem>                                                  | N-amyl acetate               | AA           |
| 18339-16-7 | <chem>O=C1CC[C@]2([C@H](C1)CC[C@@H]1[C@@H]2CC[C@]2([C@H]1CC=C2)C)C</chem> | androstenone                 | AND          |
| 4075-07-4  | <chem>O=C1CCC2(C(=C1)CCC1C2CCC2(C1CC=C2)C)C</chem>                        | androstadienone              | ANDI         |
| 123-11-5   | <chem>COc1ccc(cc1)C=O</chem>                                              | analdehyde                   | ANIS         |
| 1797-74-6  | <chem>C=CCOC(=O)Cc1ccccc1</chem>                                          | allyl phenyl acetate         | APA          |
| 7756-96-9  | <chem>CCCCOC(=O)c1ccccc1N</chem>                                          | Butyl anthranilate           | BA           |
| 7492-70-8  | <chem>CCCCOC(=O)C(OC(=O)CCC)C</chem>                                      | butyl butyryl lactate        | BBL          |
| 23726-91-2 | <chem>C/C=C/C(=O)C1=C(C)CCCC1(C)C</chem>                                  | beta-damascone               | BDAM         |
| 24330-52-7 | <chem>SCC[C@H](S)C</chem>                                                 | 1,3-butane dithiol           | BDT          |
| 71-43-2    | <chem>c1ccccc1</chem>                                                     | benzene                      | BEN          |
| 592-84-7   | <chem>CCCCOC=O</chem>                                                     | butyl formate                | BF           |
| 928-96-1   | <chem>OCCC=CCC</chem>                                                     | cis-3-hexen-1-ol             | C3HEX        |
| 14371-10-9 | <chem>O=C/C=C/c1ccccc1</chem>                                             | Cinnamaldehyde               | CINMA        |
| 4437-20-1  | <chem>S(Cc1ccco1)SCc1ccco1</chem>                                         | coffee difuran               | COFFDF       |
| 91-64-5    | <chem>O=c1ccc2c(o1)cccc2</chem>                                           | Coumarin                     | COUM         |
| 112-31-2   | <chem>CCCCCCCCC=O</chem>                                                  | decyl aldehyde               | DA           |
| 334-48-5   | <chem>CCCCCCCCC(=O)O</chem>                                               | decanoic acid                | DECAC        |
| 10022-28-3 | <chem>CCCCCCCC(OC)OC</chem>                                               | 1,1-dimethoxy-octane         | DM8          |
| 28664-35-9 | <chem>CC1OC(=O)C(=C1)O</chem>                                             | caramel furanone             | DMHDMF       |
| 75-18-3    | <chem>CSC</chem>                                                          | dimethyl sulfide             | DMS          |
| 105-95-3   | <chem>O=C1CCCCCCCCCCC(=O)OCCO1</chem>                                     | ethylene brassylate          | EB           |
| 97-53-0    | <chem>C=CCc1ccc(c(c1)OC)O</chem>                                          | eugenol                      | EUG          |
| 93-15-2    | <chem>C=CCc1ccc(c(c1)OC)OC</chem>                                         | eugenol methyl ether         | EUGME        |
| 121-32-4   | <chem>CCOc1cc(C=O)ccc1O</chem>                                            | ethyl vanillin               | EVAN         |
| 105-87-3   | <chem>C/C(=C\COC(=O)C)/CCC=C(C)C</chem>                                   | geranyl acetate              | GA           |
| 90-05-1    | <chem>COC1=CC=CC=C1O</chem>                                               | guaiacol                     | GUAIA        |
| 78-81-9    | <chem>NCC(C)C</chem>                                                      | isobutyl amine               | IA           |
| 513-44-0   | <chem>SCC(C)C</chem>                                                      | isobutyl mercaptan           | IM           |
| 2035-99-6  | <chem>CCCCCCCC(=O)OCCC(C)C</chem>                                         | isoamyl octanoate            | IO           |
| 503-74-2   | <chem>CC(CCC(=O)O)C</chem>                                                | isovaleric acid              | IVA          |
| 5328-37-0  | <chem>OCC(C(C(=O)O)O)O</chem>                                             | laevo-arabinose              | LA           |
| 78-70-6    | <chem>C=CC(CCC=C(C)C)(O)C</chem>                                          | linalool                     | LIN          |
| 31906-04-4 | <chem>O=CC1CCC(=CC1)CCCC(O)(C)C</chem>                                    | Lyral                        | LYR          |
| 57500-00-2 | <chem>CSSCc1ccco1</chem>                                                  | methyl furfuryl disulfide    | MFUR         |
| 554-12-1   | <chem>CCC(=O)OC</chem>                                                    | Methyl propionate            | MP           |
| 2345-24-6  | <chem>C/C(=C/COC(=O)C(C)C)/CCC=C(C)C</chem>                               | neryl isobutyrate            | NI           |
| 2306-88-9  | <chem>CCCCCCCCOC(=O)CCCCC</chem>                                          | octyl octanoate              | OO           |
| 111-88-6   | <chem>CCCCCCCCS</chem>                                                    | octanethiol                  | OTHI         |
| 122-78-1   | <chem>O=CCc1ccccc1</chem>                                                 | phenyl acetaldehyde          | PA           |
| 4286-15-1  | <chem>CCC(c1ccccc1)C(=O)O</chem>                                          | (S)-(+)-2-Phenylbutyric acid | PBA          |
| 290-37-9   | <chem>n1ccncc1</chem>                                                     | Pyrazine                     | PYR          |
| 91-22-5    | <chem>c1ccc2c(c1)nccc2</chem>                                             | quinoline                    | QUIN         |
| 5989-27-5  | <chem>CC1=CC[C@@H](CC1)C(=C)C</chem>                                      | r-limonene                   | RLIM         |
| 15707-24-1 | <chem>CCc1nccnc1CC</chem>                                                 | shoyu pyrazine               | SP           |
| 4023-65-8  | <chem>OC(=O)C/C(=C\C(=O)O)/C(=O)O</chem>                                  | trans-Aconitic acid          | TAA          |
| 98-55-5    | <chem>CC1=CC[C@@H](CC1)C(O)(C)C</chem>                                    | terpineol                    | TERP         |
| 80-26-2    | <chem>CC(=O)OC(C1CCC(=CC1)C)(C)C</chem>                                   | terpinyl acetate             | TERPA        |
| 68-11-1    | <chem>OC(=O)CS</chem>                                                     | thioglycolic acid            | THIOA        |
| 60633-24-1 | <chem>CC1SC(C=N1)C</chem>                                                 | TMT                          | TMT          |
| 112-44-7   | <chem>CCCCCCCCC=O</chem>                                                  | undecanal                    | UNDEC        |
| 121-33-5   | <chem>COc1cc(C=O)ccc1O</chem>                                             | vanillin                     | VAN          |
